# Supplementary material
Source: PubMed Central journal article supplement (PMC10509725)
Supplement: jama-e2315503-s001.pdf [file jama-e2315503-s001.pdf]

## Supplemental Online Content

Savage TJ, Kronman MP, Sreedhara SK, Lee SB, Oduol T, Huybrechts KF. Amoxicillin-clavulanate vs amoxicillin for pediatric acute sinusitis. *JAMA*. doi:10.1001/jama.2023.15503

**eFigure 1.** Graphical Depiction of Study Design

**eFigure 2.** Geographic Distribution of Patients

**eFigure 3.** Propensity Score Distribution and Overlap

**eFigure 4.** Antibiotic Switches – No Outpatient Encounter

**eFigure 5.** Antibiotic Switches – Acute Sinusitis Outpatient Encounter

**eTable 1.** Exclusion Criteria

**eTable 2.** Outcome Definitions

**eTable 3.** Adverse and Control Outcome Definitions

**eTable 4.** Comprehensive Patient Characteristics

**eTable 5.** Counts of Complications of Sinusitis Among Patients Who Experienced Treatment Failure

**eTable 6.** Treatment Failure

**eTable 7.** Adverse Outcomes

**eTable 8.** Treatment Failure and Adverse Events by Age

**eTable 9.** Sensitivity Analyses

**eTable 10.** Control Outcomes

This supplemental material has been provided by the authors to give readers additional information about their work.

**eFigure 1. Graphical Depiction of Study Design**

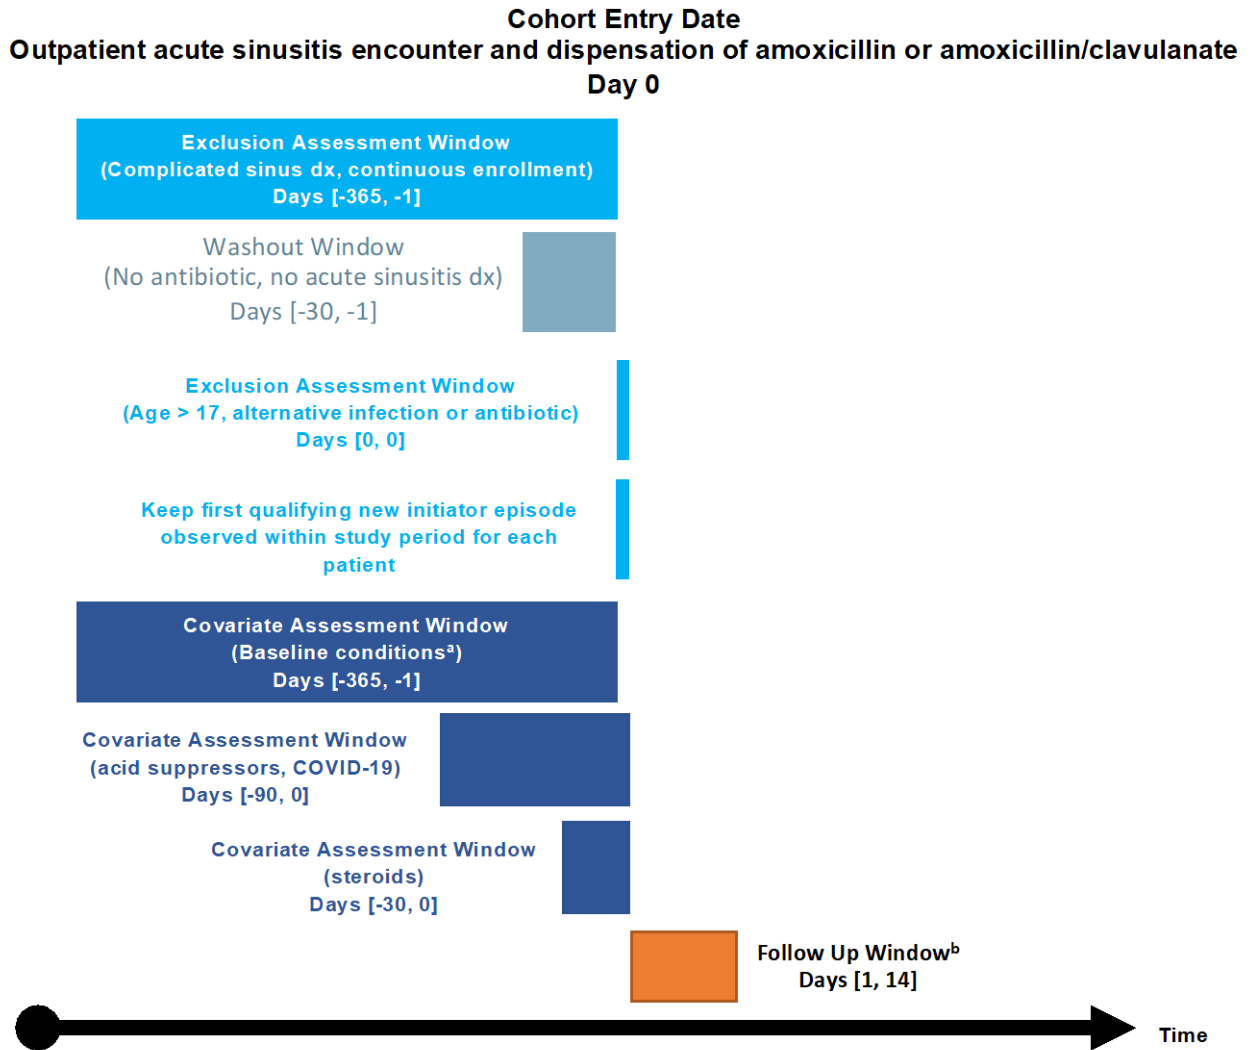

<sup>a</sup>Baseline conditions included: census region, metropolitan statistical area, pediatric comorbidity index, asthma, diabetes, immunocompromise, rhinitis, healthcare utilization, previous infectious disease diagnoses, and previous antibiotic use.

<sup>b</sup>Earliest occurrence of: outcome of interest (treatment failure), death, disenrollment, end of data, end of the study period.

## eFigure 2. Geographic Distribution of Patients

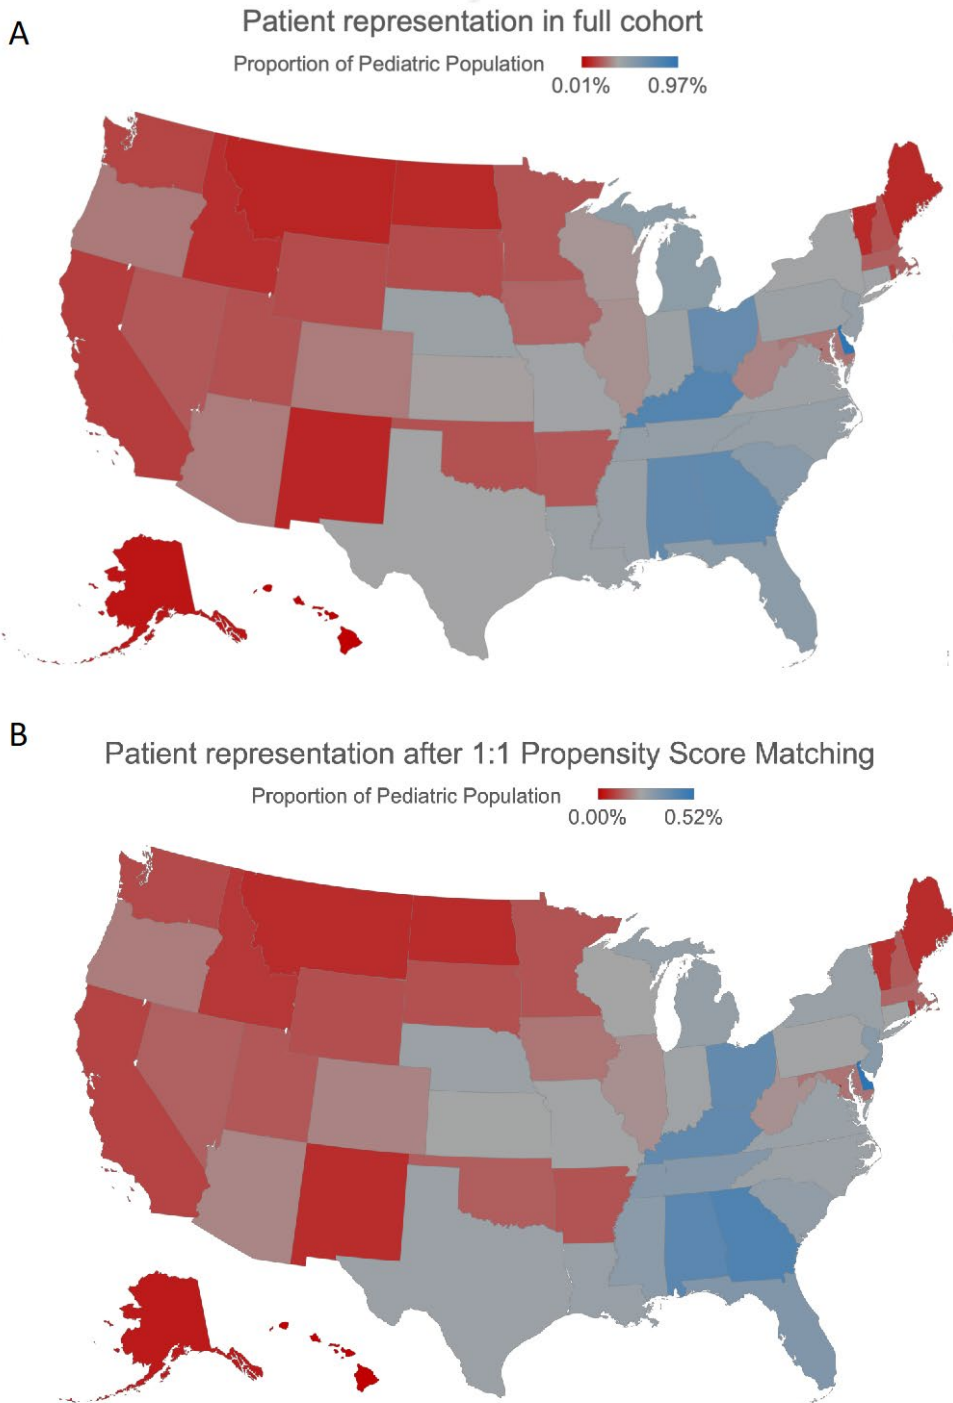

The total number of patients in the cohort, before (panel A) and after (panel B) 1:1 PS matching were compared against the total number of people younger than 19 years old in each state during the study period. Overall, the cohort comprised 0.422% of the US pediatric population during the study period, 0.26% after 1:1 PS matching. Blue shading indicates that a state contributed more patients to the cohort than the national average, while red shading indicates that a state contributed fewer patients to the cohort than the national average. 12.2% (39,050/320,141) patients had unknown state. The number of people less than 19 years old was identified via the American Community Survey, with annual totals across the study period (2017-2021) averaged to obtain a mean population size of 75,869,620.

**eFigure 3. Propensity Score Distribution and Overlap**

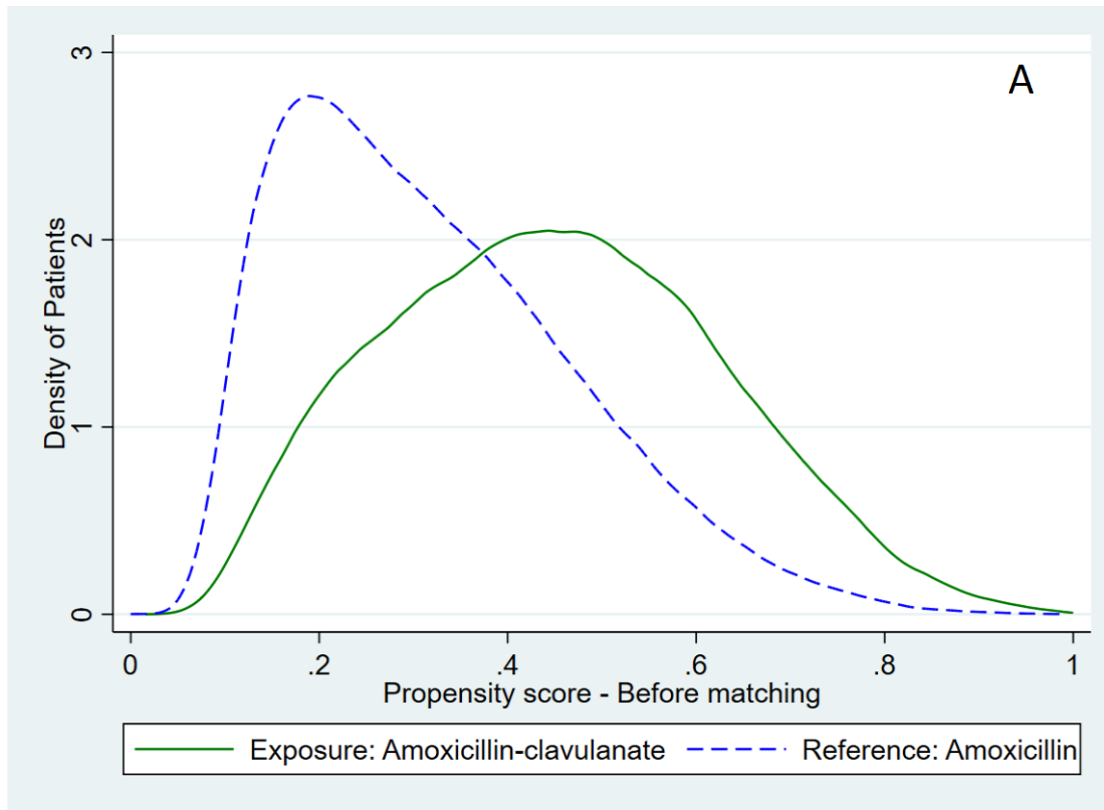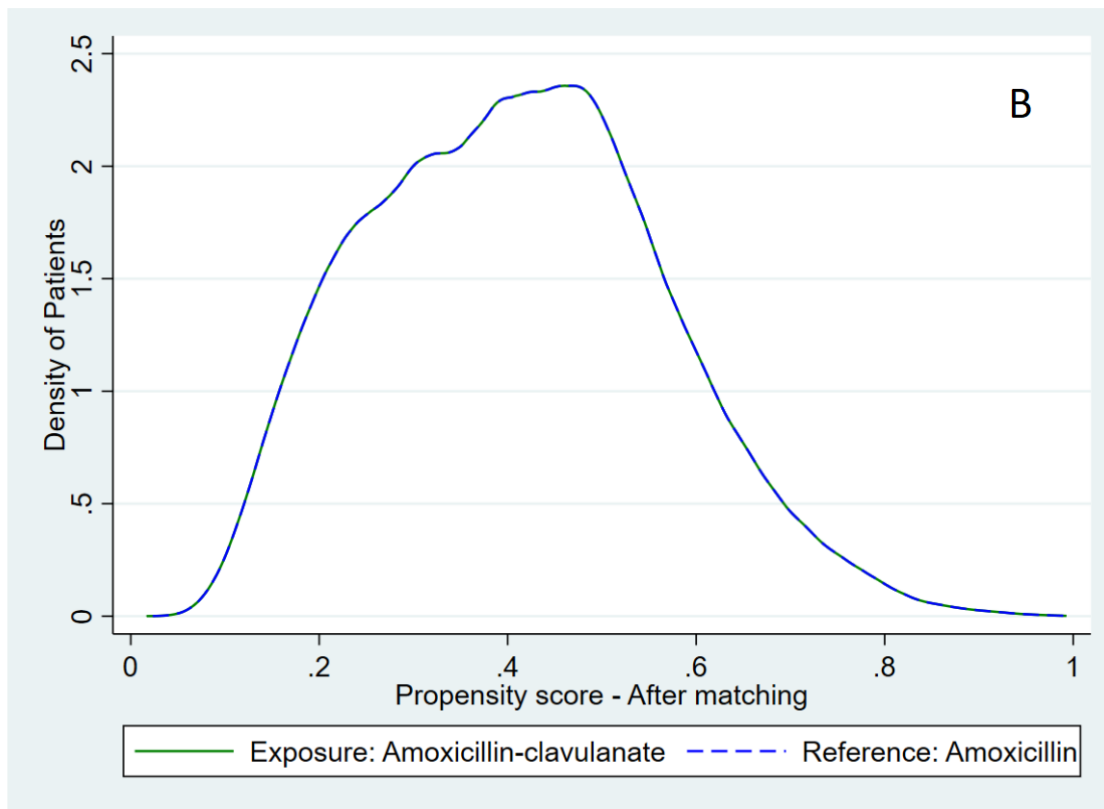

Propensity score distribution and density of the unadjusted cohort (Panel A) and after 1:1 PS matching (Panel B), by exposure. Pre-matching c-statistic was 0.714, post-matching c-statistic was 0.514.

eFigure 4. Antibiotic Switches – No Outpatient Encounter

A

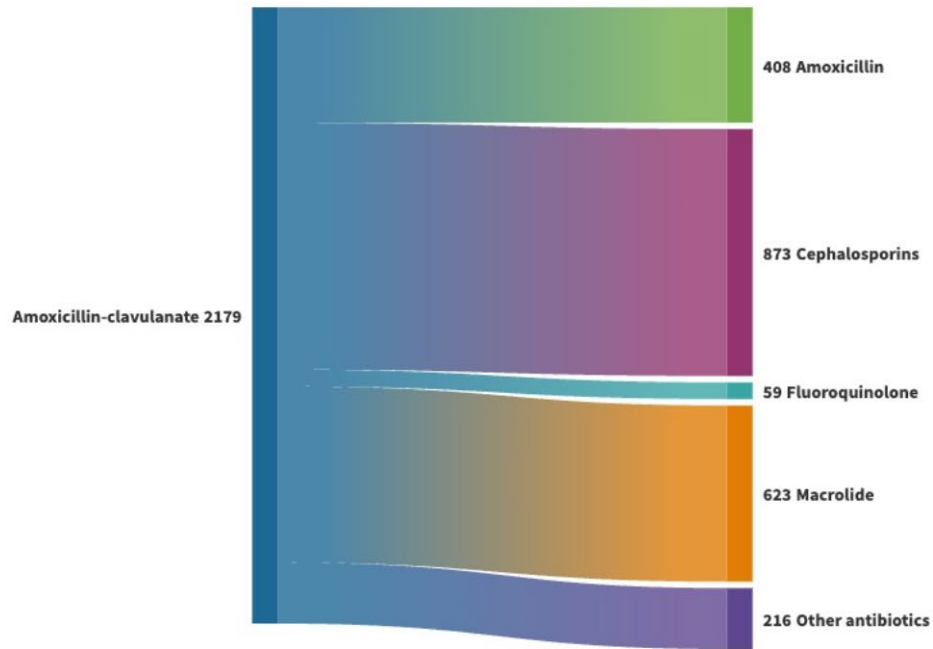

B

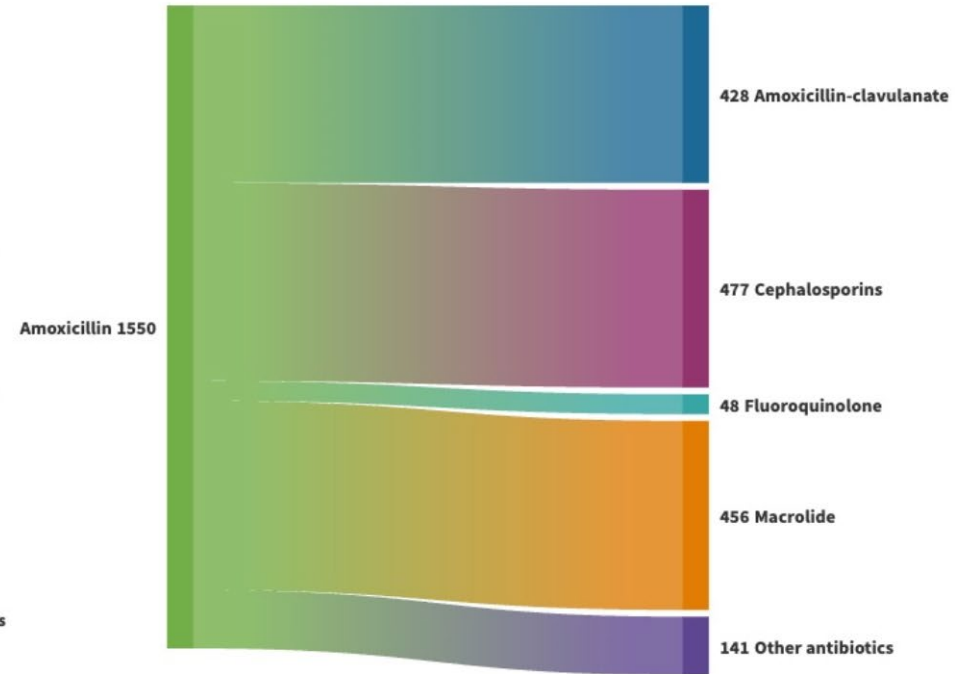

In the 1:1 propensity score matched cohort, individual antibiotic dispensations were captured and plotted on Sankey Diagrams. Antibiotic dispensations in the absence of an outpatient encounter following index exposure to amoxicillin-clavulanate (Panel A) and amoxicillin (Panel B) were identified in the 14 days after cohort entry. As antibiotics were assessed individually, a patient could potentially contribute more than one outcome if they had different antibiotics dispensed in the absence of outpatient encounters during the follow up window.

**eFigure 5. Antibiotic Switches – Acute Sinusitis Outpatient Encounter**

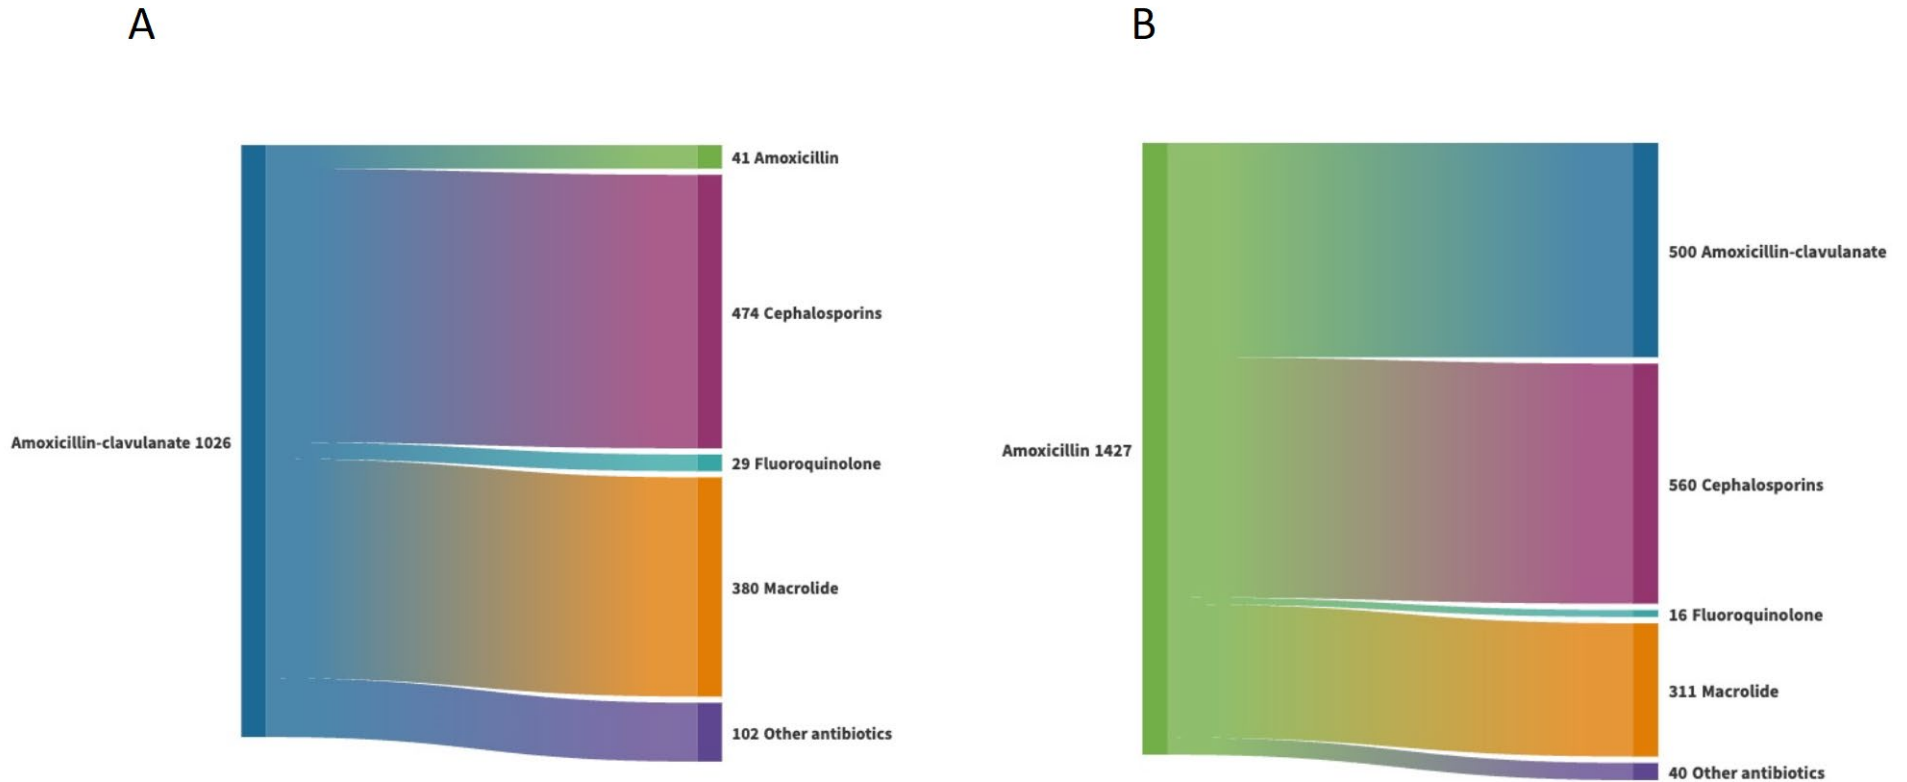

In the 1:1 propensity score matched cohort, individual antibiotic dispensations were captured and plotted on Sankey Diagrams. Antibiotic dispensations with a same-day outpatient encounter for acute sinusitis following index exposure to amoxicillin-clavulanate (Panel A) and amoxicillin (Panel B) were identified in the 14 days after cohort entry. As antibiotics were assessed individually, a patient could potentially contribute more than one outcome if they had more than the qualifying encounter in the follow up window, each with a different antibiotic.

**eTable 1. Exclusion Criteria**

| <b>Variable</b>                   | <b>Definition<sup>a</sup></b>                                                                                                                                                                                                                                                                                                                                  | <b>Assessment period (relative to CED)</b> |
|-----------------------------------|----------------------------------------------------------------------------------------------------------------------------------------------------------------------------------------------------------------------------------------------------------------------------------------------------------------------------------------------------------------|--------------------------------------------|
| Acute sinusitis                   | J01.x0                                                                                                                                                                                                                                                                                                                                                         | Required on CED<br>Excluded day -30 to -1  |
| Chronic sinusitis                 | J32.x                                                                                                                                                                                                                                                                                                                                                          | Excluded day -365 to -1                    |
| Recurrent sinusitis               | J01.x1                                                                                                                                                                                                                                                                                                                                                         | Excluded day -365 to -1                    |
| Cystic fibrosis                   | E84.0, E84.11, E84.19, E84.8, E84.9                                                                                                                                                                                                                                                                                                                            | Excluded day -365 to -1                    |
| Situs inversus                    | Q89.3                                                                                                                                                                                                                                                                                                                                                          | Excluded day -365 to -1                    |
| Choanal atresia                   | Q30.0, 30540 (CPT code), 30545 (CPT code)                                                                                                                                                                                                                                                                                                                      | Excluded day -365 to -1                    |
| Acute otitis media                | H66.00x, H66.01x, H66.4x, H66.9x                                                                                                                                                                                                                                                                                                                               | Excluded on CED                            |
| Cellulitis/abscess                | G06.x, H00.034, J39.0, J85.1, K12.2, M65.052, K65.1, K68.x, K75.0, L02.x                                                                                                                                                                                                                                                                                       | Excluded on CED                            |
| Community acquired pneumonia      | A48.1, J13, J14, J15.x, J16.x, J17, J18.x                                                                                                                                                                                                                                                                                                                      | Excluded on CED                            |
| Group A Streptococcal pharyngitis | J02.x, J03.0x                                                                                                                                                                                                                                                                                                                                                  | Excluded on CED                            |
| Urinary tract infection           | N03.2, N10, N11.x, N13.6, N30.x, N39.0                                                                                                                                                                                                                                                                                                                         | Excluded on CED                            |
| Oral antibiotics <sup>b</sup>     | Azithromycin, cefaclor, cefadroxil, cefdinir, cefditoren, cefixime, cefpodoxime, cefprozil, cefuroxime, ceftibuten, cephalexin, ciprofloxacin, clarithromycin, clindamycin, delafloxacin, dicloxacillin, doxycycline, erythromycin, levofloxacin, linezolid, moxifloxacin, penicillin V, telithromycin, tedizolid, tetracycline, trimethoprim-sulfamethoxazole | Excluded day -30 to CED                    |

<sup>a</sup>International Classification of Diseases – 10<sup>th</sup> Edition codes unless otherwise noted.

<sup>b</sup>Identified via generic names

**eTable 2. Outcome Definitions**

| <b>Outcome</b>                                                                                                                      | <b>Definition</b>                                                                                                                                                                                                                                                                                                                                                                                                                                                                                                                                                                                                                                                                                                                                                                                                                                                                                                                                                                                                                                                                                               |
|-------------------------------------------------------------------------------------------------------------------------------------|-----------------------------------------------------------------------------------------------------------------------------------------------------------------------------------------------------------------------------------------------------------------------------------------------------------------------------------------------------------------------------------------------------------------------------------------------------------------------------------------------------------------------------------------------------------------------------------------------------------------------------------------------------------------------------------------------------------------------------------------------------------------------------------------------------------------------------------------------------------------------------------------------------------------------------------------------------------------------------------------------------------------------------------------------------------------------------------------------------------------|
| <b>A new antibiotic dispensation, different from the index antibiotic, in the absence of an outpatient encounter</b>                | No outpatient encounter with the same-day dispensation of one of the following antibiotics: azithromycin, cefaclor, cefadroxil, cefdinir, cefditoren, cefixime, cefpodoxime, cefprozil, cefuroxime, ceftibuten, cephalexin, ciprofloxacin, clarithromycin, clindamycin, delafloxacin, dicloxacillin, erythromycin, levofloxacin, linezolid, moxifloxacin, penicillin V, telithromycin, tedizolid, trimethoprim-sulfamethoxazole, doxycycline, tetracycline, (amoxicillin if initially dispensed amoxicillin-clavulanate, amoxicillin-clavulanate if initially dispensed amoxicillin)                                                                                                                                                                                                                                                                                                                                                                                                                                                                                                                            |
| <b>A new antibiotic dispensation, different from the index antibiotic, with a same-day outpatient encounter for acute sinusitis</b> | Outpatient acute sinusitis encounter (ICD-10 code J01.x0) with the same-day dispensation of one of the following antibiotics: azithromycin, cefaclor, cefadroxil, cefdinir, cefditoren, cefixime, cefpodoxime, cefprozil, cefuroxime, ceftibuten, cephalexin, ciprofloxacin, clarithromycin, clindamycin, delafloxacin, dicloxacillin, erythromycin, levofloxacin, linezolid, moxifloxacin, penicillin V, telithromycin, tedizolid, trimethoprim-sulfamethoxazole, doxycycline, tetracycline, (amoxicillin if initially dispensed amoxicillin-clavulanate, amoxicillin-clavulanate if initially dispensed amoxicillin)                                                                                                                                                                                                                                                                                                                                                                                                                                                                                          |
| <b>An emergency department encounter for acute sinusitis</b>                                                                        | Emergency department encounter with an ICD-10 code J01.x0                                                                                                                                                                                                                                                                                                                                                                                                                                                                                                                                                                                                                                                                                                                                                                                                                                                                                                                                                                                                                                                       |
| <b>An inpatient encounter for acute sinusitis</b>                                                                                   | Inpatient encounter with an ICD-10 code J01.x0                                                                                                                                                                                                                                                                                                                                                                                                                                                                                                                                                                                                                                                                                                                                                                                                                                                                                                                                                                                                                                                                  |
| <b>An inpatient encounter for a complication of sinusitis</b>                                                                       | <p><u>Nasal/sinus endoscopy</u><br/>Inpatient encounter with procedure code (CPT and HCPC) in the principal position: 31233, 31235, 31237, 31238, 31239, 31240, 31241, 31253, 31254, 31255, 31256, 31257, 31259, 31267, 31276, 31287, 31288, 31290, 31291, 31292, 31293, 31294, 31295, 31296, 31297, 31298, S2344</p> <p><u>Intracranial abscess</u><br/>Inpatient encounter with an ICD-10 code in the principal position: G06.0, G06.2</p> <p><u>Intracranial thrombosis</u><br/>Inpatient encounter with an ICD-10 code in the principal position: G08, I67.6</p> <p><u>Meningitis</u><br/>Inpatient encounter with an ICD-10 code in the principal position: A39.0, G00.0-G00.9, G01, G03.8, G03.9</p> <p><u>Neurosurgery</u><br/>Inpatient encounter with procedure code (CPT and HCPC) in the principal position: 61304, 61305, 61320, 61321, 61322, 61150, 61151, 61522</p> <p><u>Orbital cellulitis</u><br/>Inpatient encounter with ICD-10 code in the principal position: H05.01x</p> <p><u>Orbital osteomyelitis</u><br/>Inpatient encounter with ICD-10 code in the principal position: H05.02x</p> |



**eTable 3. Adverse and Control Outcome Definitions**

| <b>Adverse Drug Event</b>         | <b>Follow up duration relative to cohort entry date</b> | <b>ICD-10-CM Diagnosis codes</b>                                                              |
|-----------------------------------|---------------------------------------------------------|-----------------------------------------------------------------------------------------------|
| <b>Dermatologic</b>               |                                                         |                                                                                               |
| Skin Rash                         | 1-14 days                                               | R21                                                                                           |
| Stevens-Johnson Syndrome          | 1-14 days                                               | L51.1                                                                                         |
| Toxic epidermal necrolysis        | 1-14 days                                               | L51.2, L51.3                                                                                  |
| Urticaria                         | 1-14 days                                               | L50.0, L50.1, L50.6-L50.9                                                                     |
| <b>Gastrointestinal</b>           |                                                         |                                                                                               |
| Abdominal pain                    | 1-14 days                                               | R10.0-R10.33, R10.84-R10.9                                                                    |
| Nausea/vomiting                   | 1-14 days                                               | R11.0-R11.12, R11.2                                                                           |
| Non- <i>C. difficile</i> diarrhea | 1-14 days                                               | K52.29-K52.3, K52.831-K52.9, R19.7                                                            |
| <b>Hypersensitivity</b>           |                                                         |                                                                                               |
| Anaphylaxis                       | 0-2 days                                                | T78.2XXA, T88.6XXA                                                                            |
| Angioedema                        | 0-2 days                                                | H02.841-H02.849, T78.3XXA                                                                     |
| Laryngeal edema                   | 0-2 days                                                | J38.4                                                                                         |
| Unspecified allergy               | 1-14 days                                               | T78.40XA, T78.49XA                                                                            |
| <b>Secondary infections</b>       |                                                         |                                                                                               |
| <i>C. difficile</i> infection     | 1-90 days                                               | A04.7-A04.72                                                                                  |
| Yeast infection                   | 1-90 days                                               | B37, B37.0-B37.9                                                                              |
| <b>Kidney</b>                     |                                                         |                                                                                               |
| Acute kidney injury               | 1-14 days                                               | N00.0- N00.9, N00.A, N17.0-N17.9, N19, R94.4                                                  |
| <b>Control Outcomes</b>           |                                                         |                                                                                               |
| Ingrown nail                      | 1-90 days                                               | L60.0                                                                                         |
| Tendonitis/tendinopathy           | 1-90 days                                               | M66.20, M66.221-M66.80, M66.821-M66.9, M75.120-M75.122, M76.50-M76.62, M76.811-M76.829, M77.9 |
| Wart removal                      | 1-90 days                                               | 17110 <sup>a</sup>                                                                            |

<sup>a</sup>CPT code

**eTable 4. Comprehensive Patient Characteristics**

| Covariate                     | Unadjusted                           |                          |                                  | Propensity score matched            |                         |                                  |
|-------------------------------|--------------------------------------|--------------------------|----------------------------------|-------------------------------------|-------------------------|----------------------------------|
|                               | Amoxicillin-clavulanate (n= 117,659) | Amoxicillin (n= 202,482) | Absolute standardized difference | Amoxicillin-clavulanate (n= 99,471) | Amoxicillin (n= 99,471) | Absolute standardized difference |
| <b>Year</b>                   |                                      |                          |                                  |                                     |                         |                                  |
| 2017                          | 36,607 (31.1)                        | 63,960 (31.6)            | 0.01                             | 30,989 (31.2)                       | 31,039 (31.2)           | 0.00                             |
| 2018                          | 28,450 (24.2)                        | 48,408 (23.9)            | 0.01                             | 24,008 (24.1)                       | 23,936 (24.1)           | 0.00                             |
| 2019                          | 29,086 (24.7)                        | 48,462 (23.9)            | 0.02                             | 24,480 (24.6)                       | 24,476 (24.6)           | 0.00                             |
| 2020                          | 10,475 (8.9)                         | 17,070 (8.4)             | 0.02                             | 8,762 (8.8)                         | 8,809 (8.9)             | 0.00                             |
| 2021                          | 13,041 (11.1)                        | 24,582 (12.1)            | 0.03                             | 11,232 (11.3)                       | 11,211 (11.3)           | 0.00                             |
| <b>Demographics</b>           |                                      |                          |                                  |                                     |                         |                                  |
| Age, median (IQR)             | 13 (7,16)                            | 8 (4,13)                 | 0.52                             | 12 (6, 15)                          | 12 (6, 15)              | 0.01                             |
| <b>Age</b>                    |                                      |                          |                                  |                                     |                         |                                  |
| 0 – 5 years                   | 23,812 (20.2)                        | 74,677 (36.9)            | 0.38                             | 22,656 (22.8)                       | 22,411 (22.5)           | 0.01                             |
| 6 – 11 years                  | 27,480 (23.4)                        | 61,676 (30.5)            | 0.16                             | 26,046 (26.2)                       | 26,103 (26.2)           | 0.00                             |
| 12 – 17 years                 | 66,367 (56.4)                        | 66,129 (32.7)            | 0.49                             | 50,769 (51.0)                       | 50,957 (51.2)           | 0.00                             |
| Female                        | 59,087 (50.2)                        | 103,135 (50.9)           | 0.01                             | 50,094 (50.4)                       | 50,246 (50.5)           | 0.00                             |
| Male                          | 58,572 (49.8)                        | 99,347 (49.1)            | 0.01                             | 49,377 (49.6)                       | 49,225 (49.5)           | 0.00                             |
| <b>Census Region</b>          |                                      |                          |                                  |                                     |                         |                                  |
| Northeast                     | 18,961 (16.1)                        | 29,503 (14.6)            | 0.04                             | 15,538 (15.6)                       | 15,504 (15.6)           | 0.00                             |
| North Central                 | 22,693 (19.3)                        | 43,768 (21.6)            | 0.06                             | 19,848 (20.0)                       | 19,671 (19.8)           | 0.01                             |
| South                         | 60,584 (51.5)                        | 109,056 (53.9)           | 0.05                             | 52,003 (52.3)                       | 52,152 (52.4)           | 0.00                             |
| West                          | 15,098 (12.8)                        | 19,666 (9.7)             | 0.10                             | 11,808 (11.9)                       | 11,861 (11.9)           | 0.00                             |
| Unknown                       | 323 (0.3)                            | 489 (0.2)                | 0.02                             | 274 (0.3)                           | 283 (0.3)               | 0.00                             |
| State                         |                                      |                          | 0.32                             |                                     |                         | 0.16                             |
| Metropolitan Statistical Area |                                      |                          | 0.56                             |                                     |                         | 0.21                             |
| <b>Medical History</b>        |                                      |                          |                                  |                                     |                         |                                  |
| Allergic rhinitis             | 21,016 (17.9)                        | 31,651 (15.6)            | 0.06                             | 16,964 (17.1)                       | 17,066 (17.2)           | 0.00                             |
| Anxiety                       | 11,091 (9.4)                         | 12,792 (6.3)             | 0.13                             | 8,527 (8.6)                         | 8,524 (8.6)             | 0.00                             |

|                                                 |               |               |      |               |               |      |
|-------------------------------------------------|---------------|---------------|------|---------------|---------------|------|
| Asthma                                          | 6,268 (5.3)   | 9,190 (4.5)   | 0.04 | 5,037 (5.1)   | 5,046 (5.1)   | 0.00 |
| Chronic rhinitis                                | 2,909 (2.5)   | 4,916 (2.4)   | 0.00 | 2,345 (2.4)   | 2,342 (2.4)   | 0.00 |
| Diabetes mellitus, type 1                       | 549 (0.5)     | 613 (0.3)     | 0.03 | 411 (0.4)     | 414 (0.4)     | 0.00 |
| Diabetes mellitus, type 2                       | 431 (0.4)     | 438 (0.2)     | 0.03 | 325 (0.3)     | 313 (0.3)     | 0.00 |
| Any malignancy                                  | 245 (0.2)     | 315 (0.2)     | 0.01 | 196 (0.2)     | 186 (0.2)     | 0.00 |
| Primary immunodeficiency                        | 425 (0.4)     | 431 (0.2)     | 0.28 | 300 (0.3)     | 281 (0.3)     | 0.00 |
| Bone marrow transplant                          | 22 (0.0)      | 24 (0.0)      | 0.01 | 15 (0.0)      | 13 (0.0)      | 0.00 |
| Solid organ transplant                          | 45 (0.0)      | 58 (0.0)      | 0.01 | 35 (0.0)      | 30 (0.0)      | 0.00 |
| Overweight or obese                             | 9,629 (8.2)   | 15,222 (7.5)  | 0.03 | 8,064 (8.1)   | 8,119 (8.2)   | 0.00 |
| Underweight/failure to thrive                   | 1,480 (1.3)   | 3,525 (1.7)   | 0.04 | 1,346 (1.4)   | 1,339 (1.3)   | 0.01 |
| Inflammatory bowel disease                      | 185 (0.2)     | 255 (0.1)     | 0.01 | 157 (0.2)     | 151 (0.2)     | 0.00 |
| Irritable bowel syndrome                        | 427 (0.4)     | 519 (0.3)     | 0.02 | 337 (0.3)     | 339 (0.3)     | 0.00 |
| Constipation                                    | 5,165 (4.4)   | 10,382 (5.1)  | 0.04 | 4,504 (4.5)   | 4,482 (4.5)   | 0.00 |
| Pediatric comorbidity index <sup>a,b</sup>      | 1.34 (2.09)   | 1.03 (1.76)   | 0.16 | 1.24 (1.97)   | 1.24 (1.99)   | 0.00 |
| Prior infectious disease <sup>a</sup>           |               |               |      |               |               |      |
| Acute sinusitis <sup>c</sup>                    | 0.43 (1.38)   | 0.30 (1.07)   | 0.03 | 0.36 (1.22)   | 0.35 (1.22)   | 0.00 |
| Upper respiratory tract infection <sup>d</sup>  | 1.06 (2.59)   | 1.20 (2.68)   | 0.01 | 1.06 (2.57)   | 1.06 (2.61)   | 0.00 |
| Community acquired pneumonia <sup>d</sup>       | 0.11 (1.15)   | 0.11 (1.19)   | 0.00 | 0.10 (1.09)   | 0.10 (1.36)   | 0.02 |
| Acute otitis media <sup>d</sup>                 | 0.65 (2.61)   | 0.73 (2.59)   | 0.00 | 0.64 (2.49)   | 0.65 (2.66)   | 0.01 |
| Group A Strep pharyngitis <sup>d</sup>          | 1.58 (3.30)   | 1.44 (3.06)   | 0.01 | 1.52 (3.18)   | 1.51 (3.25)   | 0.00 |
| COVID-19 <sup>e</sup>                           | 355 (0.3)     | 519 (0.3)     | 0.00 | 291 (0.3)     | 286 (0.3)     | 0.00 |
| Medications                                     |               |               |      |               |               |      |
| Influenza vaccine <sup>d</sup>                  | 44,219 (37.6) | 88,773 (43.8) | 0.13 | 38,559 (38.8) | 38,575 (38.8) | 0.00 |
| Nasal corticosteroids <sup>f</sup>              | 14,310 (12.2) | 16,666 (8.2)  | 0.13 | 10,877 (10.9) | 10,904 (11.0) | 0.00 |
| Oral corticosteroids <sup>f</sup>               | 12,082 (10.3) | 13,226 (6.5)  | 0.14 | 8,655 (8.7)   | 8,657 (8.7)   | 0.00 |
| Inhaled corticosteroids                         | 2,859 (2.4)   | 4,015 (2.0)   | 0.03 | 2,264 (2.3)   | 2,276 (2.3)   | 0.00 |
| Proton pump inhibitors <sup>e</sup>             | 1,389 (1.2)   | 1,673 (0.8)   | 0.04 | 1,078 (1.1)   | 1,088 (1.1)   | 0.00 |
| H2-Receptor Antagonists <sup>e</sup>            | 884 (0.8)     | 1,531 (0.8)   | 0.00 | 708 (0.7)     | 699 (0.7)     | 0.00 |
| Number of distinct prescriptions <sup>d,g</sup> | 2 (1,5)       | 2 (0,4)       | 0.19 | 2 (1,4)       | 2 (1,4)       | 0.00 |
| No. prior amox uses <sup>a,c</sup>              | 0.36 (0.70)   | 0.51 (0.84)   | 0.19 | 0.38 (0.73)   | 0.39 (0.72)   | 0.01 |

|                                                  |                |                |      |               |               |      |
|--------------------------------------------------|----------------|----------------|------|---------------|---------------|------|
| No. prior amox/clav uses <sup>a,c</sup>          | 0.26 (0.66)    | 0.13 (0.43)    | 0.23 | 0.19 (0.52)   | 0.19 (0.53)   | 0.00 |
| No. prior broad antibiotics <sup>a,h</sup>       | 0.37 (0.80)    | 0.31 (0.73)    | 0.08 | 0.34 (0.76)   | 0.34 (0.78)   | 0.00 |
| Days' supply of initial antibiotic dispensation  |                |                |      |               |               |      |
| Fewer than 4 days                                | 210 (0.2)      | 449 (0.2)      | 0.00 | 190 (0.2)     | 207 (0.2)     | 0.00 |
| 5 – 7 days                                       | 13,335 (11.3)  | 9,781 (4.8)    | 0.24 | 8,112 (8.2)   | 8,042 (8.1)   | 0.00 |
| 8 – 9 days                                       | 390 (0.3)      | 714 (0.4)      | 0.02 | 348 (0.3)     | 350 (0.4)     | 0.02 |
| 10 days                                          | 91,977 (78.2)  | 173,585 (85.7) | 0.20 | 81,148 (81.6) | 81,288 (81.7) | 0.00 |
| 11 – 14 days                                     | 8,838 (7.5)    | 14,800 (7.3)   | 0.01 | 7,431 (7.5)   | 7,374 (7.4)   | 0.00 |
| More than 15 days                                | 2,909 (2.5)    | 3,153 (1.6)    | 0.06 | 2,242 (2.3)   | 2,210 (2.2)   | 0.01 |
| Care setting                                     |                |                |      |               |               |      |
| Office                                           | 101,895 (86.6) | 184,682 (91.2) | 0.15 | 87,700 (88.2) | 87,673 (88.1) | 0.00 |
| Urgent care                                      | 11,316 (9.6)   | 12,005 (5.9)   | 0.14 | 8,329 (8.4)   | 8,367 (8.4)   | 0.00 |
| Retail health clinic                             | 718 (0.6)      | 579 (0.3)      | 0.04 | 454 (0.5)     | 453 (0.5)     | 0.00 |
| Emergency room                                   | 901 (0.8)      | 707 (0.3)      | 0.07 | 601 (0.6)     | 568 (0.6)     | 0.00 |
| Other/missing/unknown                            | 2,829 (2.4)    | 4,509 (2.2)    | 0.01 | 2,387 (2.4)   | 2,410 (2.4)   | 0.00 |
| Prescribing provider type                        |                |                |      |               |               |      |
| Pediatrician                                     | 58,149 (49.4)  | 124,927 (61.7) | 0.25 | 52,611 (52.9) | 52,671 (53.0) | 0.00 |
| Family Medicine                                  | 16,887 (14.4)  | 22,898 (11.3)  | 0.09 | 13,718 (13.8) | 13,672 (13.7) | 0.00 |
| Nurse practitioner                               | 8,126 (6.9)    | 11,143 (5.5)   | 0.06 | 6,495 (6.5)   | 6,449 (6.5)   | 0.00 |
| Physician's assistant                            | 2,706 (2.3)    | 3,194 (1.6)    | 0.05 | 2,064 (2.1)   | 2,072 (2.1)   | 0.00 |
| Peds Emergency Med                               | 104 (0.1)      | 158 (0.1)      | 0.00 | 91 (0.1)      | 90 (0.1)      | 0.00 |
| Emergency Med                                    | 3,631 (3.1)    | 4,458 (2.2)    | 0.06 | 2,772 (2.8)   | 2,754 (2.8)   | 0.00 |
| All others                                       | 28,056 (23.8)  | 35,704 (17.6)  | 0.15 | 21,720 (21.8) | 21,763 (21.9) | 0.00 |
| Healthcare Utilization <sup>a,d</sup>            |                |                |      |               |               |      |
| Outpatient nurse encounters                      | 0.05 (0.79)    | 0.04 (0.55)    | 0.02 | 0.05 (0.76)   | 0.05 (0.71)   | 0.00 |
| Outpatient encounters                            | 5.25 (4.62)    | 5.07 (4.31)    | 0.04 | 5.08 (4.43)   | 5.07 (4.51)   | 0.00 |
| Emergency department encounters                  | 0.27 (0.73)    | 0.25 (0.69)    | 0.02 | 0.26 (0.71)   | 0.26 (0.71)   | 0.00 |
| Inpatient encounters                             | 0.11 (1.48)    | 0.09 (1.48)    | 0.02 | 0.10 (1.43)   | 0.10 (1.40)   | 0.00 |
| Bacterial conjunctivitis at time of cohort entry | 3,124 (2.7)    | 3,686 (1.8)    | 0.06 | 2,435 (2.4)   | 2,453 (2.5)   | 0.01 |

| Insurance plan type               |               |                |      |               |               |      |
|-----------------------------------|---------------|----------------|------|---------------|---------------|------|
| Comprehensive                     | 1,973 (1.7)   | 4,056 (2.0)    | 0.02 | 1,737 (1.7)   | 1,672 (1.7)   | 0.00 |
| EPO                               | 1,038 (0.9)   | 1,520 (0.8)    | 0.01 | 847 (0.9)     | 865 (0.9)     | 0.00 |
| HMO                               | 12,146 (10.3) | 21,625 (10.7)  | 0.01 | 10,406 (10.5) | 10,463 (10.5) | 0.00 |
| POS                               | 7,405 (6.3)   | 10,622 (5.2)   | 0.05 | 5,932 (6.0)   | 5,872 (5.9)   | 0.00 |
| PPO                               | 60,509 (51.4) | 103,829 (51.3) | 0.00 | 51,059 (51.3) | 50,960 (51.2) | 0.00 |
| PPO with capitation               | 572 (0.5)     | 953 (0.5)      | 0.00 | 490 (0.5)     | 499 (0.5)     | 0.00 |
| HDHP                              | 15,274 (13.0) | 27,110 (13.4)  | 0.01 | 13,086 (13.2) | 13,142 (13.2) | 0.00 |
| CDHP                              | 17,139 (14.6) | 30,263 (14.9)  | 0.01 | 14,589 (14.7) | 14,670 (14.7) | 0.00 |
| Missing                           | 1,603 (1.4)   | 2,504 (1.2)    | 0.02 | 1,325 (1.3)   | 1,328 (1.3)   | 0.00 |
| Pharmacy copays, USD <sup>a</sup> | 9.32 (22.61)  | 8.72 (24.11)   | 0.03 | 9.23 (22.15)  | 9.30 (27.04)  | 0.00 |

All values are number (%) unless otherwise noted. All patient characteristics were assessed in the year preceding cohort entry, unless otherwise noted (age was included as a continuous variable). All listed covariates were included in estimation of the propensity score.

<sup>a</sup>Mean (sd).

<sup>b</sup>Pediatric comorbidity index predicts the one-year risk of hospitalization in children based upon 24 conditions assessed via ICD-10 codes and was developed and validated using the MarketScan database. The score ranges from 0 to 29, with each point increase associated with 1.39 increased odds of hospitalization. [add appropriate numerical citation here]

<sup>c</sup>Assessed 365 to 30 days prior to cohort entry

<sup>d</sup>Assessed in 365 days prior to cohort entry

<sup>e</sup>Assessed in 90 days prior to cohort entry

<sup>f</sup>Assessed in 30 days prior to and including day of cohort entry

<sup>g</sup>Median (IQR)

<sup>h</sup>Includes cefdinir, cefpodoxime, cefixime, azithromycin, levofloxacin, moxifloxacin.

**eTable 5. Counts of Complications of Sinusitis Among Patients Who Experienced Treatment Failure in The Primary Analysis**

| <b>Complication of Sinusitis</b>    | <b>Amoxicillin-clavulanate</b> | <b>Amoxicillin</b> |
|-------------------------------------|--------------------------------|--------------------|
| Orbital cellulitis                  | 10                             | 3                  |
| Intracranial abscess                | 2                              | 1                  |
| Meningitis                          | 2                              | 0                  |
| Functional Endoscopic Sinus Surgery | 0                              | 0                  |
| Intracranial thrombosis             | 0                              | 0                  |
| Neurosurgery                        | 0                              | 0                  |
| Orbital osteomyelitis               | 0                              | 0                  |
| Other acute osteomyelitis           | 0                              | 0                  |

**eTable 6. Treatment Failure**

| Outcome                                                                      | No. / total No. (%)              |                       | Difference (95% CI), % | Relative risk (95% CI) |
|------------------------------------------------------------------------------|----------------------------------|-----------------------|------------------------|------------------------|
|                                                                              | Amoxicillin-clavulanate Exposure | Amoxicillin Referent  |                        |                        |
| <b>Overall Composite Treatment Failure Outcome (primary outcome)</b>         |                                  |                       |                        |                        |
| Unadjusted                                                                   | 3,784 / 117,659 (3.2)            | 5,710 / 202,482 (2.8) | 0.4 (0.27, 0.52)       | 1.15 (1.10, 1.19)      |
| Propensity score matched                                                     | 3,209 / 99,471 (3.2)             | 2,928 / 99,471 (2.9)  | 0.28 (0.13, 0.43)      | 1.10 (1.05, 1.16)      |
| High dimensional propensity score matched                                    | 3,194 / 99,183 (3.2)             | 2,973 / 99,183 (3.0)  | 0.22 (0.07, 0.38)      | 1.08 (1.02, 1.13)      |
| <b>Component outcomes</b>                                                    |                                  |                       |                        |                        |
| New antibiotic dispensation without an outpatient encounter <sup>a</sup>     |                                  |                       |                        |                        |
| Unadjusted                                                                   | 2,523 / 117,659 (2.1)            | 2,961 / 202,482 (1.5) | 0.68 (0.59, 0.78)      | 1.48 (1.40, 1.56)      |
| Propensity score matched                                                     | 2,179 / 99,471 (2.2)             | 1,550 / 99,471 (1.6)  | 0.63 (0.51, 0.75)      | 1.42 (1.33, 1.51)      |
| High dimensional propensity score matched                                    | 2,165 / 99,180 (2.2)             | 1,538 / 99,180 (1.6)  | 0.63 (0.51, 0.75)      | 1.42 (1.33, 1.51)      |
| New antibiotic dispensation with outpatient sinusitis encounter <sup>a</sup> |                                  |                       |                        |                        |
| Unadjusted                                                                   | 1,238 / 117,659 (1.1)            | 2,790 / 202,482 (1.4) | -0.33 (-0.40, -0.25)   | 0.76 (0.71, 0.82)      |
| Propensity score matched                                                     | 1,010 / 99,471 (1.0)             | 1,405 / 99,471 (1.4)  | -0.40 (-0.49, -0.30)   | 0.72 (0.66, 0.78)      |
| High dimensional propensity score matched                                    | 1,005 / 99,135 (1.0)             | 1,418 / 99,135 (1.4)  | -0.42 (-0.51, -0.32)   | 0.71 (0.65, 0.77)      |
| Emergency department encounter for acute sinusitis                           |                                  |                       |                        |                        |
| Unadjusted                                                                   | 74 / 117,659 (0.1)               | 67 / 202,482 (0.0)    | 0.03 (0.01, 0.05)      | 1.90 (1.37, 2.65)      |
| Propensity score matched                                                     | 58 / 99,471 (0.1)                | 33 / 99,471 (0.0)     | 0.03 (0.01, 0.04)      | 1.76 (1.15, 2.70)      |
| High dimensional propensity score matched                                    | 56 / 99,104 (0.1)                | 43 / 99,104 (0.0)     | 0.01 (-0.01, 0.03)     | 1.30 (0.88, 1.94)      |
| Inpatient encounter for acute sinusitis                                      |                                  |                       |                        |                        |
| Unadjusted                                                                   | 6 / 117,659 (0.0)                | 3 / 202,482 (0.0)     | 0.00 (-0.00, 0.01)     | 3.44 (0.86, 13.76)     |
| Propensity score matched                                                     | 5 / 99,471 (0.0)                 | 1 / 99,471 (0.0)      | 0.00 (0.00, 0.01)      | 5.00 (0.58, 42.80)     |
| High dimensional propensity score matched                                    | 5 / 99,216 (0.0)                 | 2 / 99,216 (0.0)      | 0.00 (-0.00, 0.01)     | 2.50 (0.49, 12.89)     |
| Inpatient encounter for sinusitis complications                              |                                  |                       |                        |                        |
| Unadjusted                                                                   | 16 / 117,659 (0.0)               | 6 / 202,482 (0.0)     | 0.01 (0.00, 0.02)      | 4.59 (1.80, 11.73)     |
| Propensity score matched                                                     | 14 / 99,471 (0.0)                | 4 / 99,471 (0.0)      | 0.01 (0.00, 0.02)      | 3.50 (1.15, 10.63)     |
| High dimensional propensity score matched                                    | 15 / 99,146 (0.0)                | 5 / 99,146 (0.0)      | 0.01 (0.00, 0.02)      | 3.00 (1.09, 8.25)      |
| <b>Serious treatment failure<sup>b</sup></b>                                 |                                  |                       |                        |                        |

|                                           |                    |                    |                   |                   |
|-------------------------------------------|--------------------|--------------------|-------------------|-------------------|
| Unadjusted                                | 87 / 117,659 (0.1) | 71 / 202,482 (0.0) | 0.04 (0.02, 0.06) | 2.11 (1.54, 2.88) |
| Propensity score matched                  | 70 / 99,471 (0.1)  | 35 / 99,471 (0.0)  | 0.04 (0.01, 0.06) | 2.00 (1.33, 3.00) |
| High dimensional propensity score matched | 66 / 99,123 (0.1)  | 39 / 99,123 (0.0)  | 0.03 (0.01, 0.05) | 1.69 (1.14, 2.52) |

Treatment failure is the first occurrence of any of: a new, different antibiotic dispensation without a same-day outpatient encounter, a new, different antibiotic dispensation with a same-day outpatient acute sinusitis encounter, an ED or inpatient encounter for acute sinusitis, and an inpatient encounter for complications of sinusitis. Serious treatment failure is the first occurrence of an ED encounter for acute sinusitis, inpatient encounter for acute sinusitis, or inpatient encounter for a complication of sinusitis.



**eTable 7. Adverse Outcomes**

| Outcome                                          | No. / total No. (%)              |                       | Mean difference (95% CI), % | Relative risk (95% CI) |
|--------------------------------------------------|----------------------------------|-----------------------|-----------------------------|------------------------|
|                                                  | Amoxicillin-clavulanate Exposure | Amoxicillin Referent  |                             |                        |
| <b>Any adverse event</b>                         |                                  |                       |                             |                        |
| Unadjusted                                       | 2,642 / 117,659 (2.2)            | 4,300 / 202,482 (2.1) | 0.12 (0.02, 0.23)           | 1.06 (1.02, 1.11)      |
| PS matched                                       | 2,249 / 99,471 (2.3)             | 1,970 / 99,471 (2.0)  | 0.28 (0.15, 0.41)           | 1.15 (1.08, 1.22)      |
| HdPS matched                                     | 2,216 / 99,302 (2.2)             | 2,024 / 99,302 (2.0)  | 0.19 (0.07, 0.32)           | 1.10 (1.03, 1.17)      |
| <b>Gastrointestinal symptoms<sup>a,b</sup></b>   |                                  |                       |                             |                        |
| Unadjusted                                       | 1,383 / 117,659 (1.2)            | 1,944 / 202,482 (1.0) | 0.22 (0.14, 0.29)           | 1.22 (1.14, 1.31)      |
| PS matched                                       | 1,160 / 99,471 (1.2)             | 1,014 / 99,471 (1.0)  | 0.14 (0.06, 0.24)           | 1.15 (1.05, 1.25)      |
| HdPS matched                                     | 1,141 / 99,244 (1.2)             | 1,004 / 99,244 (1.0)  | 0.14 (0.05, 0.23)           | 1.14 (1.05, 1.24)      |
| <b>Yeast infection<sup>c</sup></b>               |                                  |                       |                             |                        |
| Unadjusted                                       | 516 / 117,659 (0.4)              | 705 / 202,482 (0.3)   | 0.09 (0.04, 0.14)           | 1.26 (1.12, 1.41)      |
| PS matched                                       | 443 / 99,471 (0.4)               | 333 / 99,471 (0.3)    | 0.11 (0.06, 0.17)           | 1.33 (1.16, 1.54)      |
| HdPS matched                                     | 447 / 99,140 (0.5)               | 313 / 99,140 (0.3)    | 0.14 (0.08, 0.19)           | 1.43 (1.24, 1.65)      |
| <b>Skin reactions<sup>a</sup></b>                |                                  |                       |                             |                        |
| Unadjusted                                       | 406 / 117,659 (0.3)              | 898 / 202,482 (0.4)   | -0.10 (-0.14, -0.05)        | 0.78 (0.69, 0.87)      |
| PS matched                                       | 356 / 99,471 (0.4)               | 331 / 99,471 (0.3)    | 0.02 (-0.03, 0.08)          | 1.08 (0.93, 1.25)      |
| HdPS matched                                     | 361 / 99,270 (0.4)               | 355 / 99,270 (0.4)    | 0.01 (-0.05, 0.06)          | 1.02 (0.88, 1.18)      |
| <b>Hypersensitivity reactions<sup>d</sup></b>    |                                  |                       |                             |                        |
| Unadjusted                                       | 416 / 117,659 (0.4)              | 943 / 202,482 (0.5)   | -0.11 (-0.16, -0.07)        | 0.76 (0.68, 0.85)      |
| PS matched                                       | 361 / 99,471 (0.4)               | 375 / 99,471 (0.4)    | -0.01 (-0.07, 0.04)         | 0.96 (0.83, 1.11)      |
| HdPS matched                                     | 352 / 99,167 (0.4)               | 401 / 99,167 (0.4)    | -0.05 (-0.10, 0.01)         | 0.88 (0.76, 1.01)      |
| <b><i>C. difficile</i> infection<sup>c</sup></b> |                                  |                       |                             |                        |
| Unadjusted                                       | 29 / 117,659 (0.0)               | 24 / 202,482 (0.0)    | 0.01 (0.00, 0.02)           | 2.08 (1.21, 3.57)      |
| PS matched                                       | 22 / 99,471 (0.0)                | 12 / 99,471 (0.0)     | 0.01 (0.00, 0.02)           | 1.83 (0.91, 3.71)      |
| HdPS matched                                     | 24 / 99,191 (0.0)                | 14 / 99,191 (0.0)     | 0.01 (-0.00, 0.02)          | 1.71 (0.89, 3.31)      |
| <b>Acute kidney injury<sup>a</sup></b>           |                                  |                       |                             |                        |
| Unadjusted                                       | 9 / 117,659 (0.0)                | 10 / 202,482 (0.0)    | 0.00 (-0.00, 0.01)          | 1.55 (0.63, 3.81)      |
| PS matched                                       | 8 / 99,471 (0.0)                 | 2 / 99,471 (0.0)      | 0.00 (-0.00, 0.01)          | 4.00 (0.85, 18.84)     |
| HdPS matched                                     | 9 / 99,206 (0.0)                 | 6 / 99,206 (0.0)      | 0.00 (-0.01, 0.01)          | 1.50 (0.53, 4.21)      |

<sup>a</sup>Measured from day 1 to day 14 after cohort entry date.

<sup>b</sup>The first occurrence of: nausea/vomiting, abdominal pain, non-*C. difficile* diarrhea.

<sup>c</sup>Measured from day 1 to day 90 after cohort entry date.

<sup>d</sup>The first occurrence of: anaphylaxis, laryngeal edema, angioedema, unspecified allergy, and urticaria. Anaphylaxis, laryngeal edema, and angioedema were measured from day 0 to day 2 after cohort entry date, while unspecified allergy and urticaria were measured from day 1 to day 14 after cohort entry date.

**eTable 8. Treatment Failure and Adverse Events by Age**

| Outcome                   | Amoxicillin-clavulanate, No. / total No. (%) | Amoxicillin, No. / total No. (%) | Mean difference (95% CI), % | Relative risk (95% CI) |
|---------------------------|----------------------------------------------|----------------------------------|-----------------------------|------------------------|
| <b>Ages 0 – 5 years</b>   |                                              |                                  |                             |                        |
| <b>Treatment Failure</b>  |                                              |                                  |                             |                        |
| Unadjusted                | 930 / 23,816 (3.9)                           | 2,122 / 74,685 (2.8)             | 1.10 (0.81, 1.32)           | 1.39 (1.29, 1.50)      |
| Propensity Score Matched  | 869 / 22,573 (3.9)                           | 725 / 22,573 (3.2)               | 0.64 (0.30, 0.98)           | 1.21 (1.09, 1.33)      |
| <b>Adverse Events</b>     |                                              |                                  |                             |                        |
| Unadjusted                | 799 / 23,816 (3.4)                           | 2,139 / 74,685 (2.9)             | 0.49 (0.23, 0.75)           | 1.17 (1.08, 1.27)      |
| Propensity Score Matched  | 759 / 22,573 (3.4)                           | 622 / 22,573 (2.8)               | 0.61 (0.29, 0.92)           | 1.23 (1.10, 1.37)      |
| <b>Ages 6 – 11 years</b>  |                                              |                                  |                             |                        |
| <b>Treatment Failure</b>  |                                              |                                  |                             |                        |
| Unadjusted                | 860 / 27,483 (3.1)                           | 1,536 / 61,677 (2.5)             | 0.64 (0.41, 0.87)           | 1.27 (1.16, 1.38)      |
| Propensity Score Matched  | 798 / 25,975 (3.1)                           | 690 / 25,975 (2.7)               | 0.42 (0.13, 0.70)           | 1.16 (1.05, 1.29)      |
| <b>Adverse Events</b>     |                                              |                                  |                             |                        |
| Unadjusted                | 553 / 27,483 (2.0)                           | 988 / 61,677 (1.6)               | 0.41 (0.21, 0.61)           | 1.26 (1.13, 1.39)      |
| Propensity Score Matched  | 512 / 25,975 (2.0)                           | 433 / 25,975 (1.7)               | 0.30 (0.07, 0.53)           | 1.19 (1.04, 1.35)      |
| <b>Ages 12 – 17 years</b> |                                              |                                  |                             |                        |
| <b>Treatment Failure</b>  |                                              |                                  |                             |                        |
| Unadjusted                | 1,994 / 66,360 (3.0)                         | 2,052 / 66,120 (3.1)             | -0.10 (-0.28, 0.09)         | 0.97 (0.91, 1.03)      |
| Propensity Score Matched  | 1,489 / 49,582 (3.0)                         | 1,564 / 49,582 (3.2)             | -0.15 (-0.37, 0.06)         | 0.95 (0.88, 1.02)      |
| <b>Adverse Events</b>     |                                              |                                  |                             |                        |
| Unadjusted                | 1,290 / 66,360 (1.9)                         | 1,173 / 66,120 (1.8)             | 0.17 (0.02, 0.32)           | 1.10 (1.01, 1.19)      |
| Propensity Score Matched  | 937 / 49,582 (1.9)                           | 903 / 49,582 (1.8)               | 0.07 (-0.10, 0.24)          | 1.04 (0.95, 1.14)      |

The sum of patients across strata does not equal the total number of patients in the primary analyses due to propensity score estimation and matching occurring after patients were stratified by age.

**eTable 9. Sensitivity Analyses**

| Outcome                                | No. / total No. (%)     |                       | Mean difference (95% CI), % | Relative risk (95% CI) |
|----------------------------------------|-------------------------|-----------------------|-----------------------------|------------------------|
|                                        | Amoxicillin-clavulanate | Amoxicillin           |                             |                        |
| Primary analysis                       | 3,209 / 99,471 (3.2)    | 2,928 / 99,471 (2.9)  | 0.28 (0.13, 0.43)           | 1.10 (1.05, 1.16)      |
| Washout: -1 to -180 days <sup>a</sup>  | 2,042 / 69,448 (2.9)    | 1,823 / 69,448 (2.6)  | 0.32 (0.14, 0.49)           | 1.12 (1.05, 1.20)      |
| Washout: -1 to -365 days <sup>a</sup>  | 1,326 / 47,498 (2.8)    | 1,145 / 47,498 (2.4)  | 0.38 (0.18, 0.58)           | 1.16 (1.07, 1.26)      |
| Outcome misclassification <sup>b</sup> | 3,268 / 99,471 (3.3)    | 3,016 / 99,471 (3.03) | 0.25 (0.1, 0.41)            | 1.09 (1.03, 1.14)      |
| Failure and relapse <sup>c</sup>       | 5,146 / 99,471 (5.2)    | 4,981 / 99,471 (5.01) | 0.17 (-0.03, 0.36)          | 1.03 (0.99, 1.08)      |
| 10-day supply only <sup>d</sup>        | 2,585 / 81,483 (3.2)    | 2,391 / 81,483 (2.9)  | 0.24 (0.07, 0.41)           | 1.08 (1.02, 1.15)      |

Treatment failure sensitivity analyses after 1:1 propensity score matching. Note that 10-day supply and Bacterial infections only analyses were identified post-hoc, while all other analyses were prespecified.

<sup>a</sup>Washout period is exclusion window for (1) any antibiotic dispensation and (2) an ICD-10 code for acute sinusitis, inpatient or outpatient, extended as indicated from baseline washout period of 30 days in primary analysis.

<sup>b</sup>Outcome misclassification analysis is same as primary analysis, with exception of outcome measure, which includes ICD-10 codes for both acute sinusitis (as in primary analysis) and recurrent sinusitis.

<sup>c</sup>Measured 1 to 30 days after cohort entry

<sup>d</sup>Cohort limited to only patients who were dispensed 10-day supplies of index antibiotic. Analysis was then same as primary analysis.

**eTable 10. Control Outcomes**

| Outcome                  | No. / total No. (%)     |                       | Mean difference<br>(95% CI), % | Relative Risk (95% CI) |
|--------------------------|-------------------------|-----------------------|--------------------------------|------------------------|
|                          | Amoxicillin-clavulanate | Amoxicillin           |                                |                        |
| Ingrown nail             |                         |                       |                                |                        |
| Unadjusted               | 416 / 117,659 (0.4)     | 406 / 202,482 (0.2)   | 0.15 (0.11, 0.19)              | 1.76 (1.54, 2.02)      |
| Propensity score matched | 313 / 99,471 (0.3)      | 266 / 99,471 (0.3)    | 0.05 (-0.09, 0.10)             | 1.18 (1.00, 1.39)      |
| HdPS matched             | 302 / 99,299 (0.3)      | 283 / 99,299 (0.3)    | 0.02 (-0.03, 0.07)             | 1.07 (0.91, 1.26)      |
| Tendonitis/tendinopathy  |                         |                       |                                |                        |
| Unadjusted               | 373 / 117,659 (0.3)     | 366 / 202,482 (0.2)   | 0.14 (0.10, 0.17)              | 1.75 (1.52, 2.03)      |
| Propensity score matched | 284 / 99,471 (0.3)      | 263 / 99,471 (0.3)    | 0.02 (-0.03, 0.07)             | 1.08 (0.91, 1.28)      |
| HdPS matched             | 263 / 99,330 (0.3)      | 261 / 99,330 (0.3)    | 0.00 (-0.10, 0.05)             | 1.01 (0.85, 1.20)      |
| Wart removal             |                         |                       |                                |                        |
| Unadjusted               | 1,094 / 117,659 (0.9)   | 1,549 / 202,482 (0.8) | 0.17 (0.10, 0.23)              | 1.22 (1.13, 1.31)      |
| Propensity score matched | 906 / 99,471 (0.9)      | 887 / 99,471 (0.9)    | 0.02 (-0.06, 0.10)             | 1.02 (0.93, 1.12)      |
| HdPS matched             | 876 / 99,184 (0.9)      | 899 / 99,184 (0.9)    | -0.02 (-0.10, 0.06)            | 0.97 (0.89, 1.07)      |

Outcomes were assessed on days +1 through +90 after cohort entry to evaluate for differences in health seeking behavior between group
